# Supplementary material
Source: MDPI journal article supplement (https://www.mdpi.com/2073-4344/10/6/601)
Supplement: s1 [file s1]

## Supplementary Materials

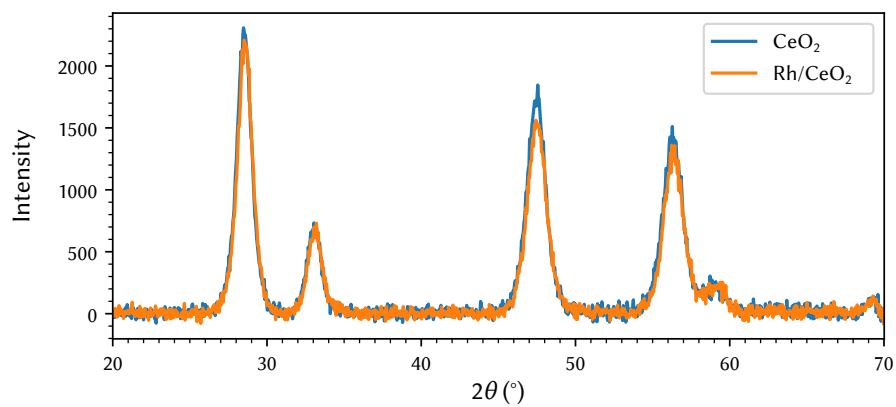

Figure S1: The diffractogram of the CeO<sub>2</sub>, with and without supported Rh, as obtained by the XRD. A background correction was performed on the data to more easily distinguish any formation of new peaks.
